# Supplementary material for: Single-cell RNA sequencing reveals plasmid constrains bacterial population heterogeneity and identifies a non-conjugating subpopulation
Source: PubMed Central journal article supplement (PMC11245611; doi:10.1038/s41467-024-49793-x), 2024-07-12
Supplement: 41467_2024_49793_MOESM1_ESM.pdf [file 41467_2024_49793_MOESM1_ESM.pdf]

Single-cell RNA sequencing reveals plasmid  
constrains bacterial population  
heterogeneity and identifies a non-  
conjugating subpopulation

Valentine Cyriaque, Rodrigo Ibarra-Chávez, Anna Kuchina, Georg Seelig, Joseph Nesme,  
Jonas Stenlørkke Madsen

**Supplementary tables and figures**

**Tab.S1.** Growth parameters of *P. putida* KT2440 (WT) and *P. putida* KT2440/pKJK5 when grown separately over 24 hours. Growth curve is displayed in figure 1. Detailed statistics can be found in tab.S4

|                                  | <b>Growth rate (<i>r</i>)</b>                                            | <b>Area Under the Curve</b>                                        |
|----------------------------------|--------------------------------------------------------------------------|--------------------------------------------------------------------|
| <i>P. putida</i><br>KT2440/pKJK5 | 0.78                                                                     | 23.43                                                              |
|                                  | 0.75                                                                     | 23.44                                                              |
|                                  | 0.79                                                                     | 23.60                                                              |
|                                  | 0.80                                                                     | 23.14                                                              |
|                                  | 0.79                                                                     | 23.10                                                              |
|                                  | 0.74                                                                     | 23.89                                                              |
|                                  | 0.77                                                                     | 23.31                                                              |
|                                  | 0.75                                                                     | 23.19                                                              |
|                                  | 0.73                                                                     | 24.06                                                              |
|                                  | 0.72                                                                     | 23.57                                                              |
|                                  | 0.75                                                                     | 23.31                                                              |
| <i>P. putida</i> KT2440<br>WT    | 1.23                                                                     | 25.54                                                              |
|                                  | 1.09                                                                     | 25.07                                                              |
|                                  | 1.16                                                                     | 24.86                                                              |
|                                  | 1.16                                                                     | 25.00                                                              |
|                                  | 1.33                                                                     | 24.22                                                              |
|                                  | 1.15                                                                     | 24.46                                                              |
|                                  | 1.11                                                                     | 24.96                                                              |
|                                  | 1.20                                                                     | 24.48                                                              |
|                                  | 1.09                                                                     | 24.91                                                              |
|                                  | 1.17                                                                     | 25.18                                                              |
|                                  | 1.03                                                                     | 24.94                                                              |
| 1.06                             | 25.41                                                                    |                                                                    |
| <i>statistical parameters</i>    | Welch Two Sample t-test (two-sided)<br>$t = -15.575$ ;<br>$p = 5.12E-10$ | Student's t-test (two-sided)<br>$t = -10.045$ ;<br>$p = 1.792E-09$ |

**Tab.S2.** Plasmid fitness cost obtained from a competition experiment between *Pseudomonas putida* KT2440 and *Pseudomonas putida* KT2440/pKJK5 in a liquid overnight agitated (250RPM) co-culture to avoid plasmid transfer between plasmid free and carrier cells.

| replicate | CFU counts               |                                 |                                 |                         |                                 |                                 | $w = \ln(P_{carrier_i} / P_{carrier_j}) / \ln(P_{free_i} / P_{free_j})$ |
|-----------|--------------------------|---------------------------------|---------------------------------|-------------------------|---------------------------------|---------------------------------|-------------------------------------------------------------------------|
|           | Before competition assay |                                 |                                 | After competition assay |                                 |                                 |                                                                         |
|           | LB (total CFU)           | tetracyclin ( $P_{carrier_i}$ ) | CFU difference ( $P_{free_i}$ ) | LB (total CFU)          | tetracyclin ( $P_{carrier_i}$ ) | CFU difference ( $P_{free_i}$ ) |                                                                         |
| 1         | 6460                     | 1470                            | 4990                            | 65800000                | 37900000                        | 27900000                        | 1,018                                                                   |
| 2         | 7100                     | 1530                            | 5570                            | 106600000               | 60300000                        | 46300000                        | 1,015                                                                   |
| 3         | 6070                     | 3250                            | 2820                            | 106300000               | 64900000                        | 41400000                        | 1,026                                                                   |
| 4         | 7030                     | 3030                            | 4000                            | 107700000               | 55700000                        | 52000000                        | 1,004                                                                   |

**Tab.S3.** Average transcripts/cell for plasmid free (P-) and carrier (P+) cells at OD 0.5 and 1.5 in the main experiment (E2) after removing cells with less than 85 transcripts and features absent in more than 10% of cells from each growth condition.

| OD  | Plasmid | Cells | Mean gene count $\pm$ SD | Mean transcript count $\pm$ SD |
|-----|---------|-------|--------------------------|--------------------------------|
| 0.5 | P-      | 499   | 168.80 $\pm$ 81.12       | 371.63 $\pm$ 311.72            |
| 1.5 | P-      | 366   | 169.13 $\pm$ 87.32       | 398.51 $\pm$ 381.96            |
| 0.5 | P+      | 206   | 181.17 $\pm$ 83.69       | 398.29 $\pm$ 292.48            |
| 1.5 | P+      | 415   | 171.67 $\pm$ 82.78       | 349.27 $\pm$ 271.34            |

**Tab.S4.** Average transcripts/cell for clusters defined with the whole transcriptome (plasmid and chromosome encoded genes), after removing cells with less than 85 transcripts and features absent in more than 10% of cells from each growth condition.

| W cluster | Cells | Mean gene count $\pm$ SD | Mean transcript count $\pm$ SD |
|-----------|-------|--------------------------|--------------------------------|
| W1        | 143   | 239.63 $\pm$ 62.60       | 577.44 $\pm$ 277.80            |
| W2        | 86    | 101.34 $\pm$ 22.71       | 161.31 $\pm$ 53.07             |
| W3        | 177   | 124.55 $\pm$ 26.23       | 216.89 $\pm$ 65.48             |
| W4        | 170   | 250.86 $\pm$ 67.34       | 643.14 $\pm$ 356.91            |
| W5        | 66    | 145.62 $\pm$ 60.11       | 293.56 $\pm$ 174.80            |
| W6        | 194   | 90.94 $\pm$ 14.39        | 131.39 $\pm$ 26.76             |
| W7        | 145   | 264.79 $\pm$ 63.02       | 627.84 $\pm$ 282.16            |
| W8        | 128   | 145.33 $\pm$ 20.56       | 253.02 $\pm$ 54.47             |
| W9        | 175   | 97.99 $\pm$ 18.18        | 155.83 $\pm$ 43.27             |
| W10       | 142   | 184.65 $\pm$ 26.80       | 388.16 $\pm$ 102.38            |
| W11       | 60    | 323.38 $\pm$ 65.87       | 1057.43 $\pm$ 505.45           |

**Tab.S5.** Average transcripts/cell for clusters defined with the chromosome-encoded gene transcriptome defined clusters (chromosome encoded genes), after removing cells with less than 85 transcripts and features absent in more than 10% of cells from each growth condition.

| <b>Ch cluster</b> | <b>Cells</b> | <b>Mean gene count <math>\pm</math> SD</b> | <b>Mean transcript count <math>\pm</math> SD</b> |
|-------------------|--------------|--------------------------------------------|--------------------------------------------------|
| <b>Ch1</b>        | 248          | 109.31 $\pm$ 26.13                         | 182.01 $\pm$ 65.29                               |
| <b>Ch2</b>        | 168          | 224.00 $\pm$ 68.33                         | 539.71 $\pm$ 295.12                              |
| <b>Ch3</b>        | 167          | 237.34 $\pm$ 57.75                         | 583.34 $\pm$ 279.17                              |
| <b>Ch4</b>        | 66           | 143.24 $\pm$ 59.30                         | 287.36 $\pm$ 172.95                              |
| <b>Ch5</b>        | 163          | 87.41 $\pm$ 11.73                          | 126.75 $\pm$ 23.62                               |
| <b>Ch6</b>        | 210          | 282.96 $\pm$ 72.30                         | 772.35 $\pm$ 441.02                              |
| <b>Ch7</b>        | 174          | 140.03 $\pm$ 23.19                         | 244.96 $\pm$ 65.29                               |
| <b>Ch8</b>        | 146          | 99.12 $\pm$ 18.16                          | 159.82 $\pm$ 44.27                               |
| <b>Ch9</b>        | 135          | 185.70 $\pm$ 26.51                         | 390.72 $\pm$ 102.70                              |

**Tab.S6.** Parameters associated with gene transcript network (Fig. S13) obtained from Spearman correlation between genes amongst cells transcripts from the same growth condition (P-0.5, P+0.5, P-1.5, P+1.5) after removing cells with less than 85 transcripts and subsampling the dataset to 206 cells with the highest number of transcripts.

| subsampled                 | P- OD0.5 | P+ OD0.5 | P- OD1.5 | P+ OD1.5 |
|----------------------------|----------|----------|----------|----------|
| Nodes                      | 201      | 252      | 219      | 246      |
| Edges                      | 696      | 689      | 1001     | 1105     |
| Avg number of neighbors    | 7.203    | 5.668    | 9.441    | 9.252    |
| Network diameter           | 8        | 9        | 8        | 8        |
| Network radius             | 5        | 5        | 4        | 4        |
| Characteristic path length | 3.176    | 3.527    | 2.984    | 3.001    |
| Clustering coefficient     | 0.104    | 0.044    | 0.114    | 0.130    |
| Network density            | 0.038    | 0.024    | 0.45     | 0.039    |
| Network heterogeneity      | 0.986    | 0.915    | 0.880    | 0.923    |
| Network centralization     | 0.154    | 0.090    | 0.181    | 0.169    |
| Connected components       | 6        | 6        | 4        | 5        |
| <b>Average correlation</b> | 0.657    | 0.655    | 0.657    | 0.657    |
| <b>Cells</b>               | 206      | 206      | 206      | 206      |

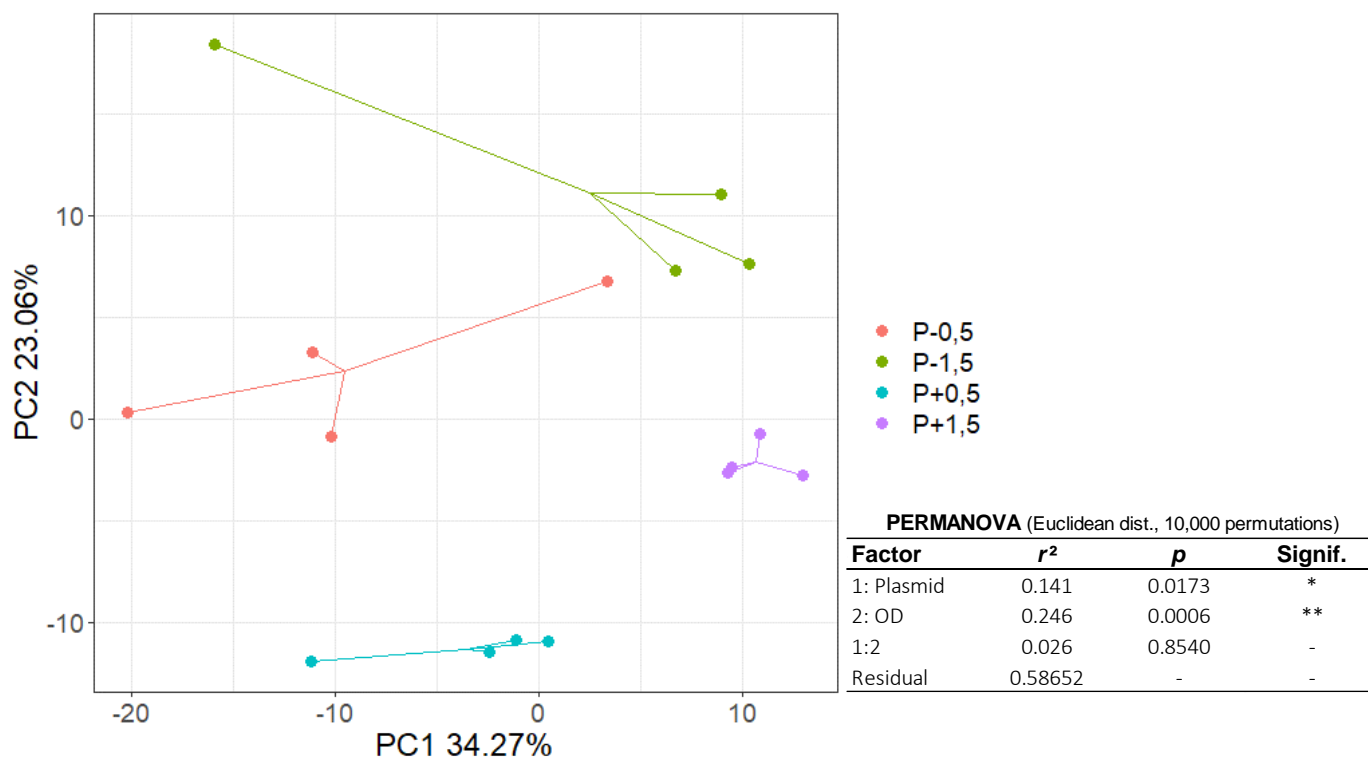

**Fig.S1.** PCA multivariate analysis separated population level (bulk) transcriptomes (plasmid and chromosome encoded genes) according to ODs and the presence of the plasmid. as confirmed using 10,000 permutations in a Permutational multivariate analysis of variance (n= 4 independent experiments).

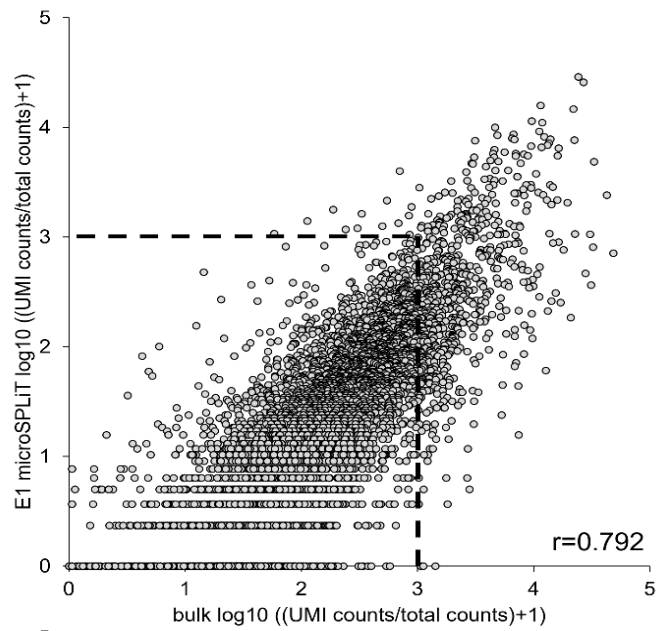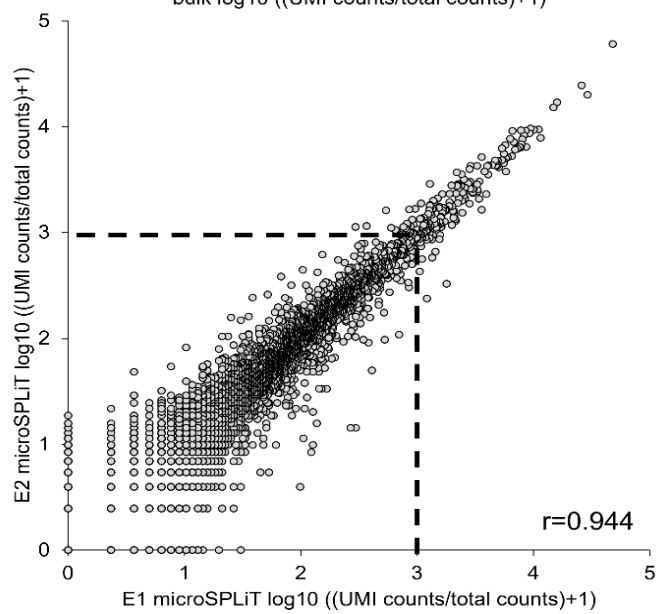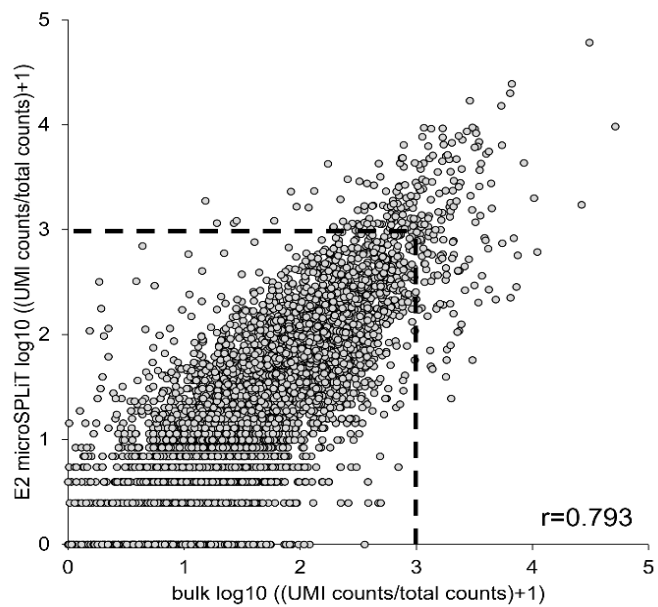

**Fig.S2.** Correlation coefficient calculated between the summed single-cell expressions per gene data of microSPLiT experimental replicates (identified here as E1 - blind control experiment or E2, microSPLiT experiment : n:2 independent experiments) or between the summed single-cell expressions per gene data from one of the microSPLiT replicates and the bulk population level (n=4 independent bulk transcriptomes).

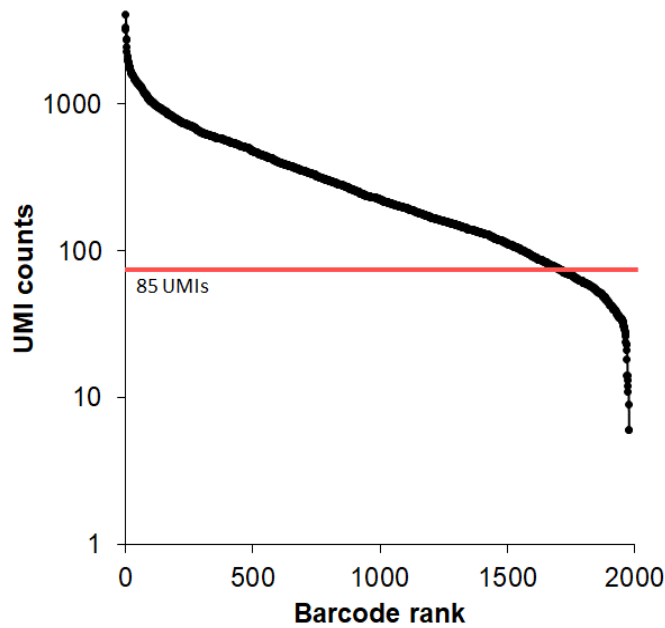

**Fig.S3.** UMI counts distribution from high to low count depths in microSPLiT sc-RNA sequencing experimental replicates (E2). Selected cells for the following analyses counted more than 85 UMIs (red line) to avoid cell count bias in cell clustering.

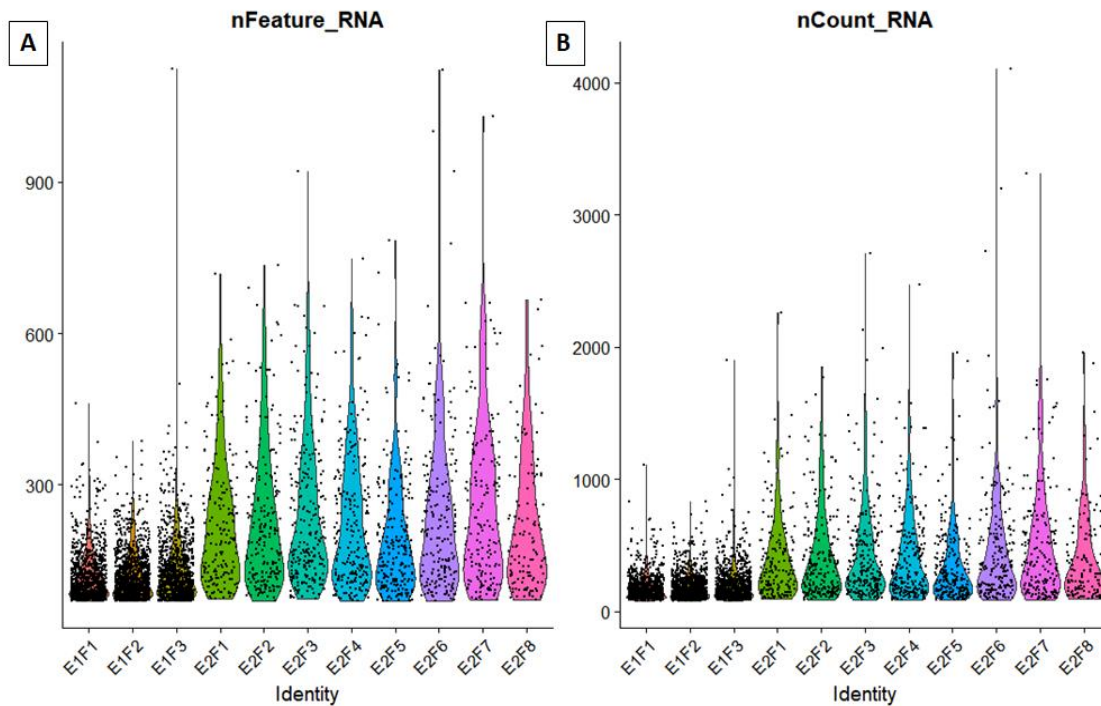

**Fig.S4.** Amount of gene features per cell (A) or UMI count per cell (B) among the microSPLiT sc-RNA sequencing blind control experiment (E1) and microSPLiT sc-RNA sequencing experimental replicates (E2) in the sub-libraries (3 sublibraries in E1, 8 sublibraries in E2). Sublibraries prepared during the microSPLiT sample preparation displayed an equivalent number of transcripts (nCounts) and genes (nFeatures). This was maintained after filtering out genes absent from more than 10% of each cell growth condition groups (Fig.S5).

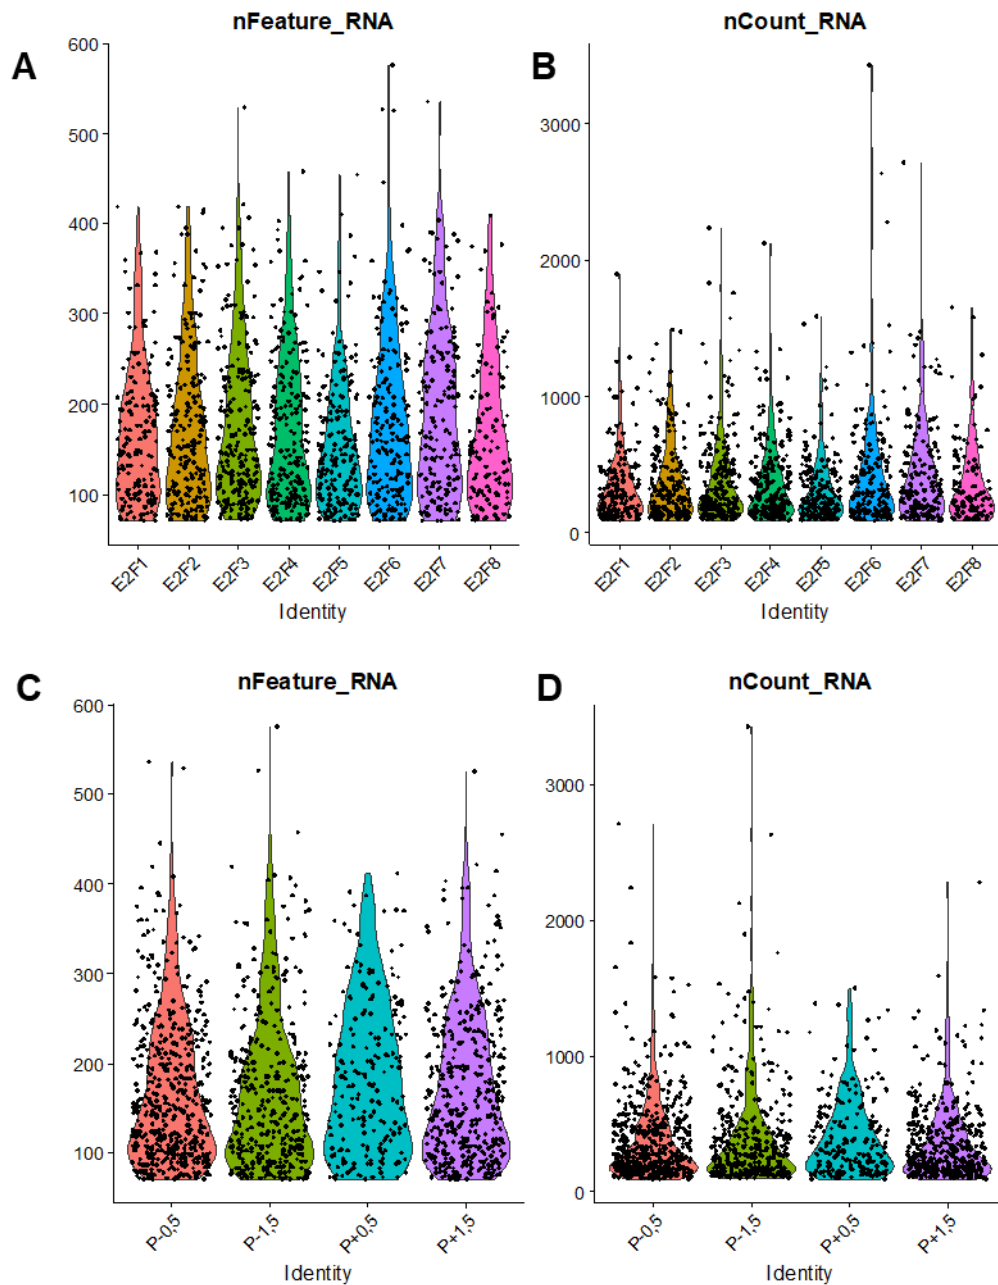

**Fig.S5.** Amount of gene features per cell (A, C) or UMI count per cell (B, D) among the microSPLiT sc-RNA sequencing experimental replicates (E2) in the 8 F sub-libraries (A-B) or in cell categories (P-0.5, P-1.5, P+0.5, P+1.5 ; C-D) after filtering out genes present in less than 10% of cells in each category.



### all genes

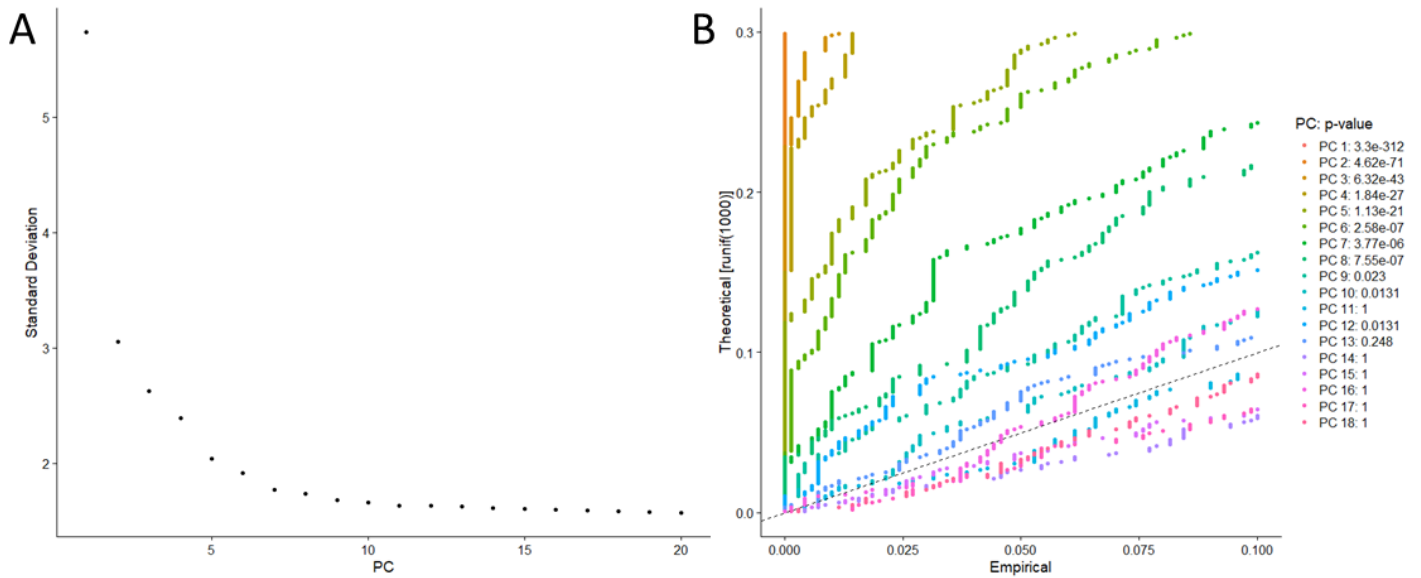

### chromosomal genes

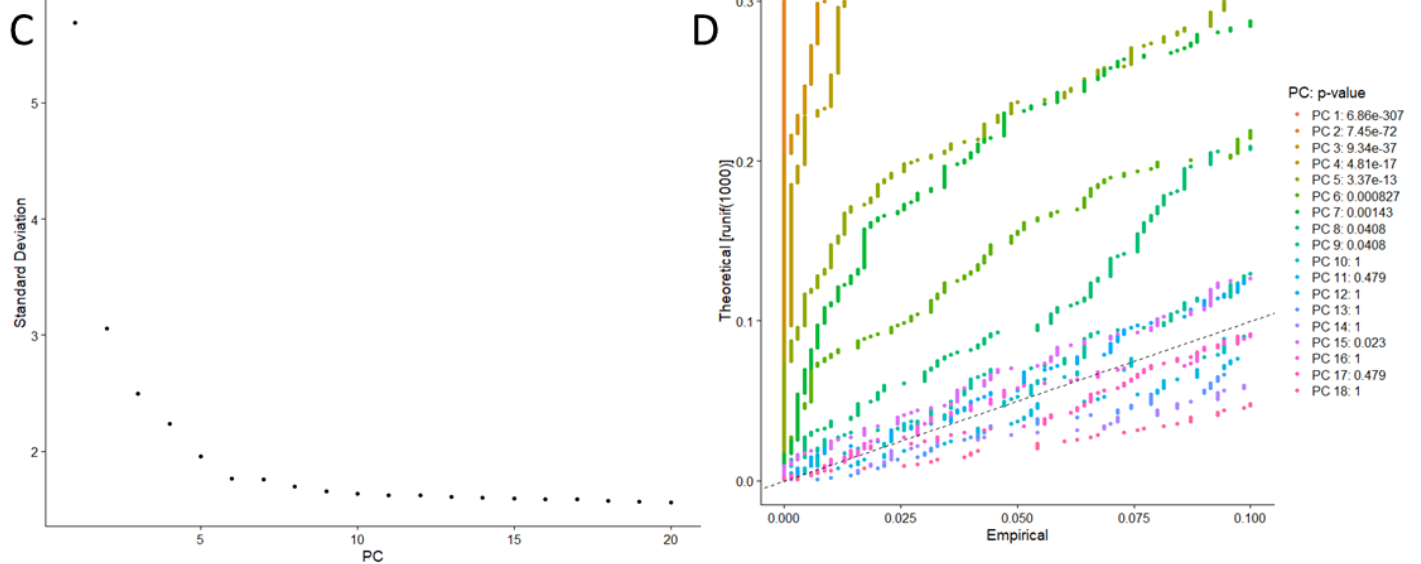

**Figures S6:** Principal components' standard deviations (A,C) and JackStraw plots after 100 resampling (B,D) obtained from PCAs carried for all-genes and chromosome-encoded genes dataset after filtering out genes displaying transcripts in less than 10 % of the cells from all growth conditions (P-0.5, P-1.5, P+0.5, P+1.5). Test and figures were generated using the *Seurat* R package.

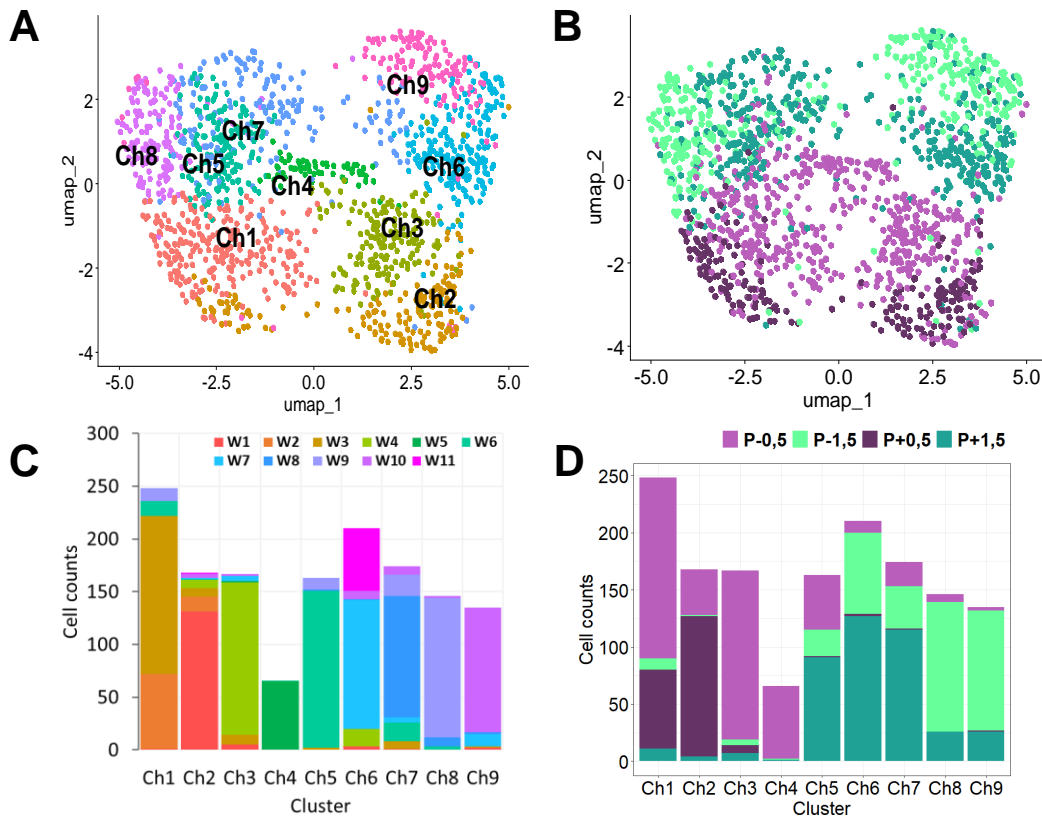

**Fig. S7.** Subpopulation clustering identified by single-cell transcriptomics of *P. putida* carrying a plasmid (P+) or not (P-) at early (OD0.5) and late exponential growth (OD1.5) using chromosome encoded-genes only (n= 1 independent experiment ; n= 1477 cells with >85 transcripts) . (A) UMAP obtained by microSPLiT scRNA sequencing identified 9 chromosome-encoded transcriptome clusters (Ch1-Ch9). Cell count in each cluster can be found in Tab. S5. (B) Clusters segregate cell transcriptomes in subpopulations separating the two different growth states (OD0.5 and 1.5). (C) W cluster membership of cells from clusters C1-9 (D) Cell transcriptomes from OD0.5 were mainly distributed in clusters Ch1-4, while cells from OD1.5 were mainly distributed in clusters Ch5-9.

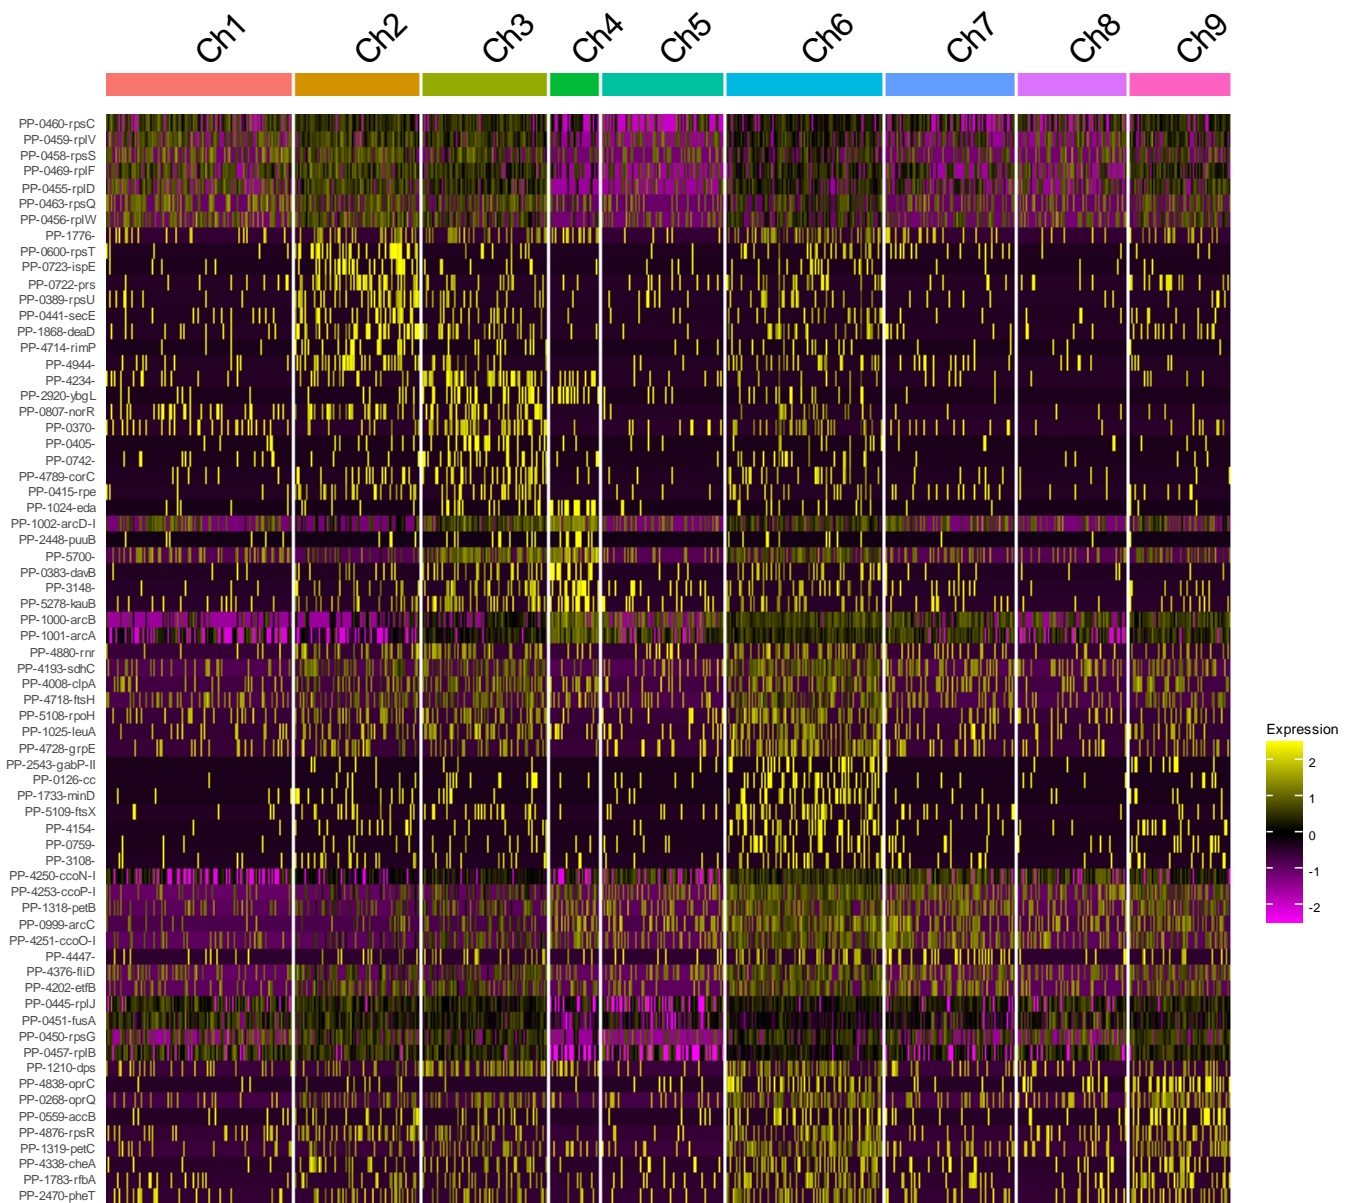

**Fig.S8.** Heatmap of transcription level displaying the top 10 bio-marker genes (Wilcoxon signed-rank test, ( $p < 0.05$ )) of Ch1-7 clusters identified with FindAllMarkers from the *Seurat* R package. Genes appearing in the top-8 of several clusters are displayed only one time. Colours represent normalized centralized transcript abundance.

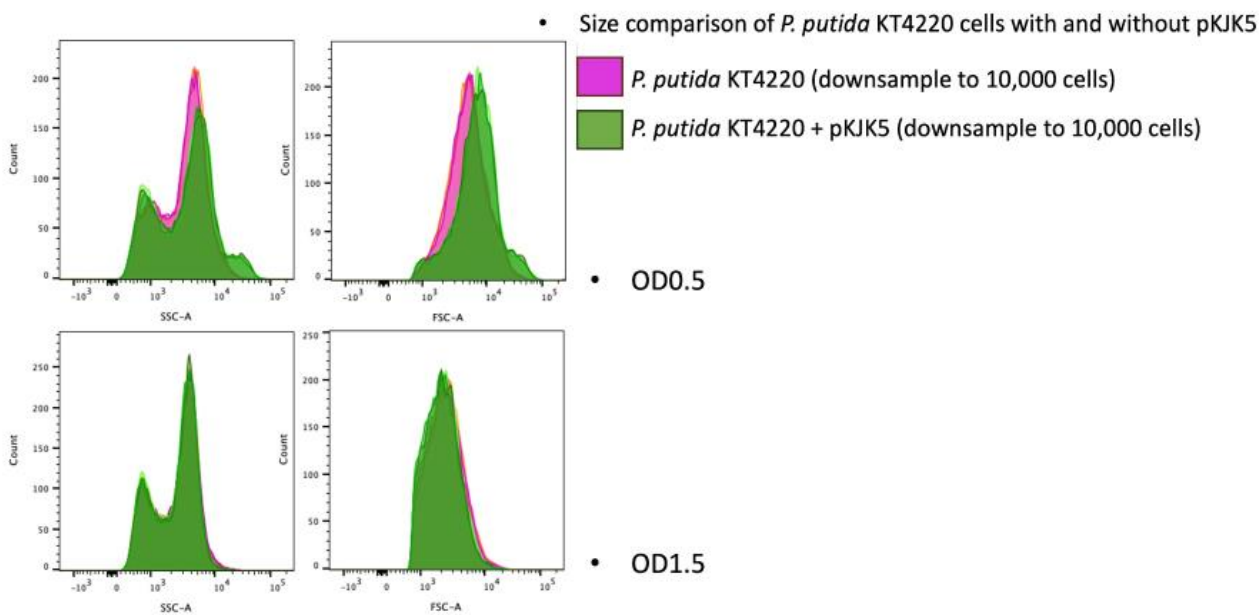

**Fig.S9.** Cell size and granulometry of plasmid free (*Pseudomonas putida* KT2440) and carrier (*Pseudomonas putida* KT2440/pKJK5) cells evaluated through flow-cytometry (SSC (left) and FSC (right) channels respectively. exc. 488 nm) . Experiment was repeated 3 times with similar results.

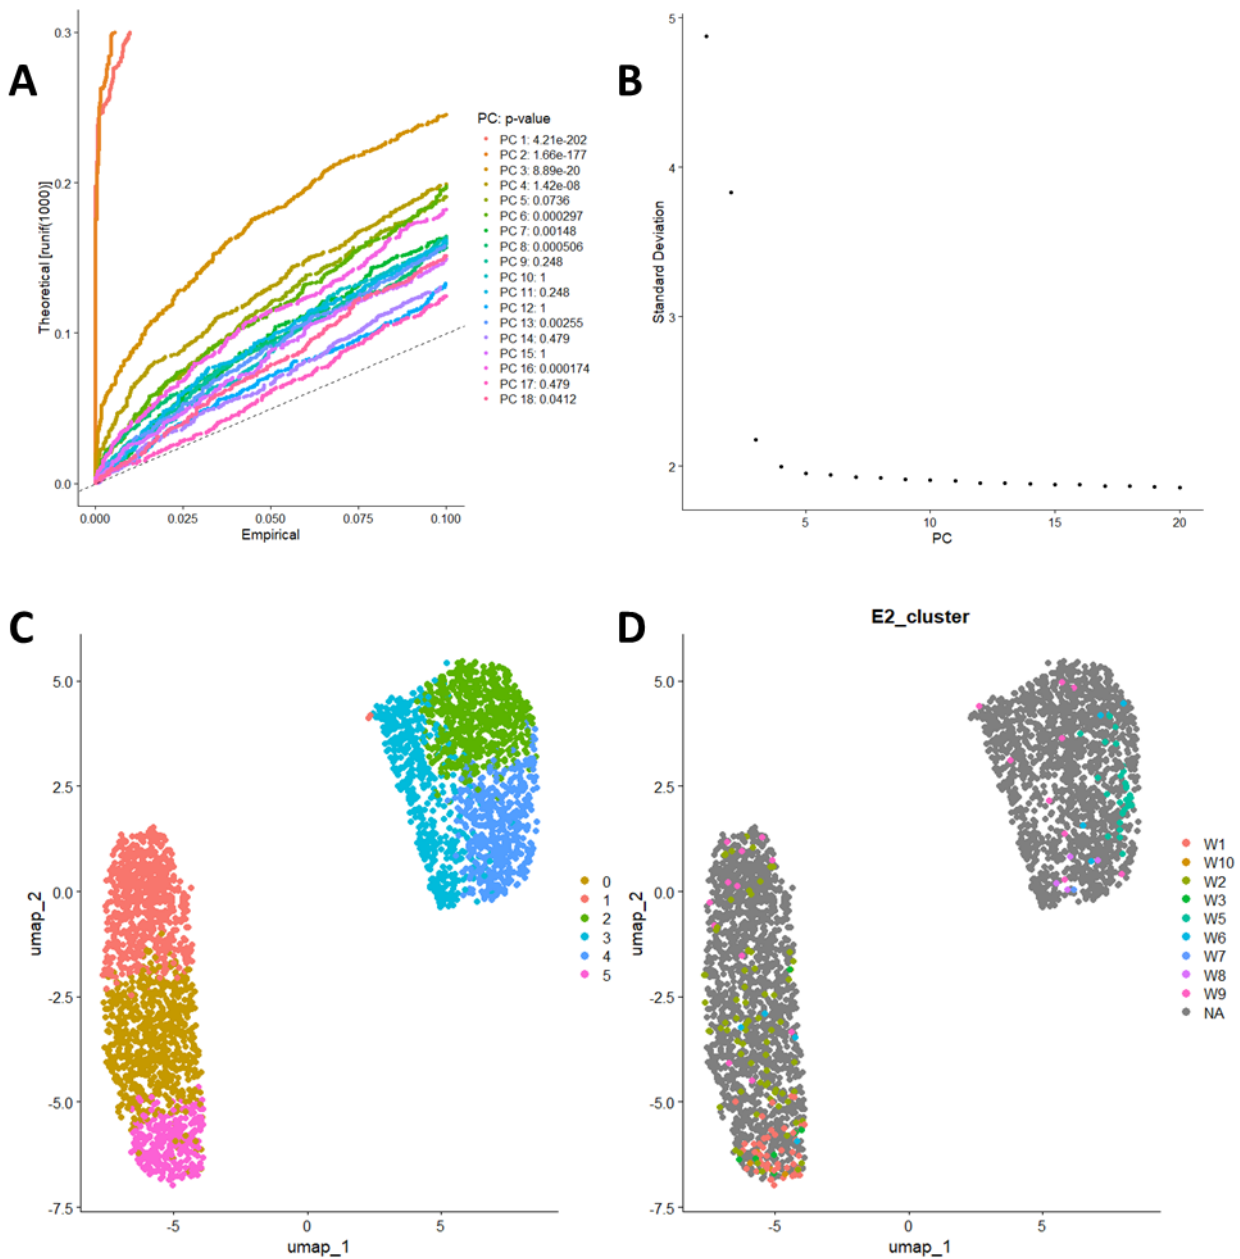

**Fig.S10. Blind control microSPLiT experiment characterization.** Principal components' standard deviations (A) and JackStraw plots after 100 resampling (B) obtained from PCAs carried for chromosome-encoded genes datasets E1 (control) and E2 (experiment) after filtering out E2 cells forming its own cluster ( $n=2$  independent experiments). (C-D) UMAP (8 dimensions) of transcriptomes of *Pseudomonas putida* obtained with microSPLiT sc-RNA sequencing (control E1 and experiment E2) (C) identifying 6 clusters and where (D) E2 cells' W cluster identity were displayed (W1-10). Grey dots represent cells from E1 experiment.

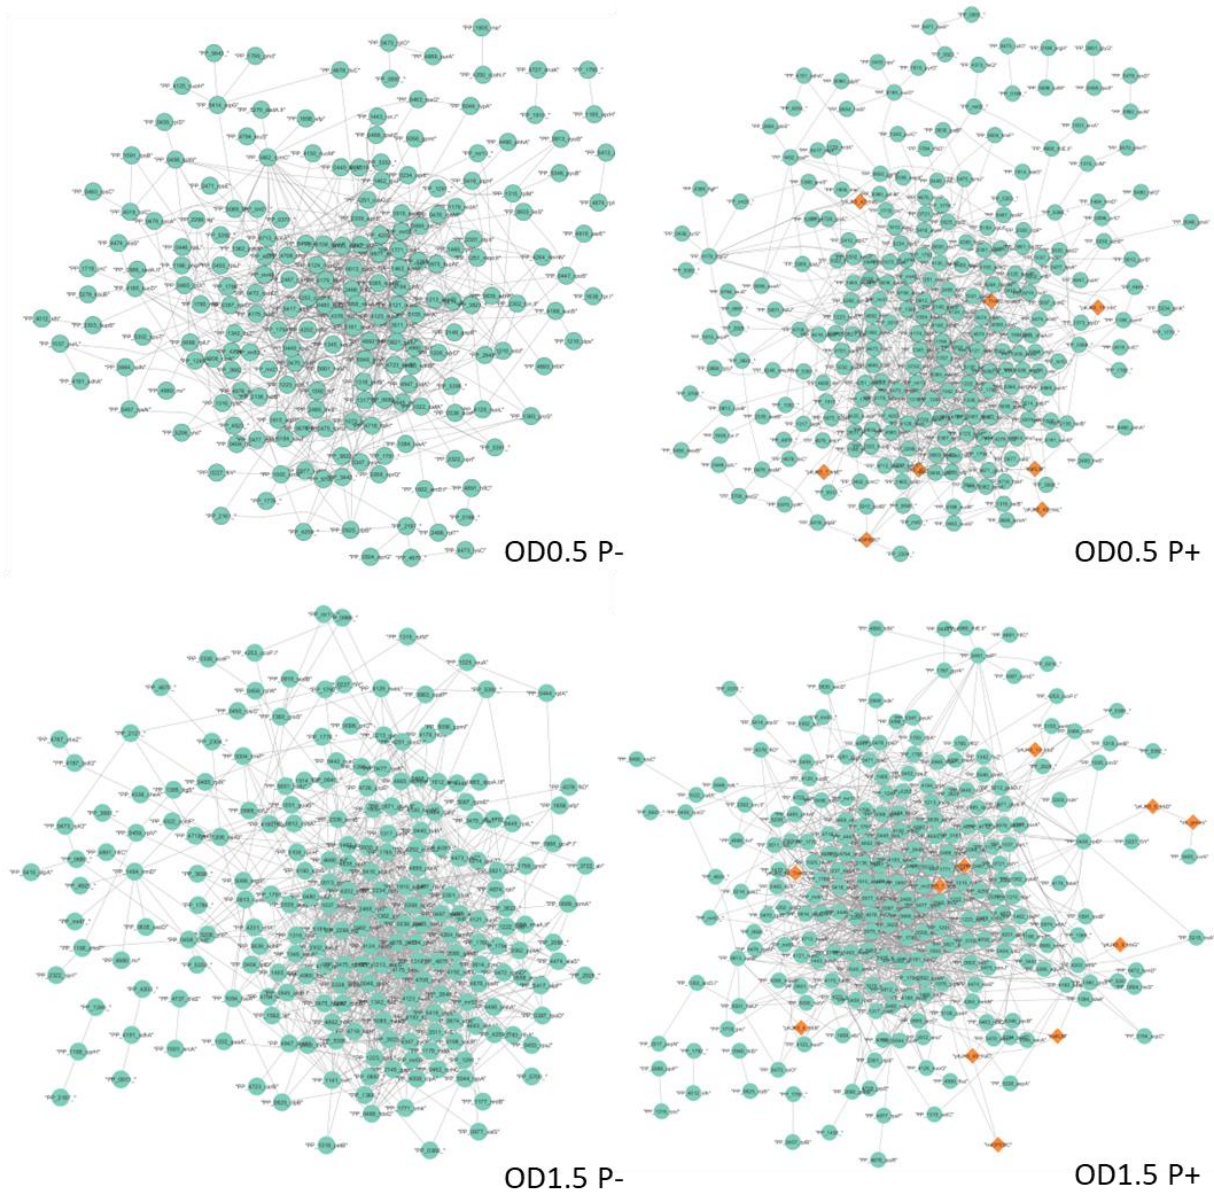

**Fig.S11.** Gene transcript network (Fig. S13) obtained from Spearman correlation between genes amongst cells transcripts from the same growth condition (P-0.5, P+0.5, P-1.5, P+1.5) after removing cells with less than 85 transcripts and subsampling the dataset to  $n=206$  cells (= minimum number of cells per group) . Each dot correspond to 1 gene transcript (blue for chromosomal transcript and orange for plasmid-encoded transcript) and lines represent positive ( $r_s > 0.6$ ,  $p < 0.5$ ,  $n > 30$ ) between those. Cell transcriptomes were colored according to the presence of plasmid encoded transcripts in their transcriptomic profile. In plasmid free cells (red), no plasmid encoded transcript was identified ; in plasmid carriers (blue), at least 1 plasmid transcript was identified.



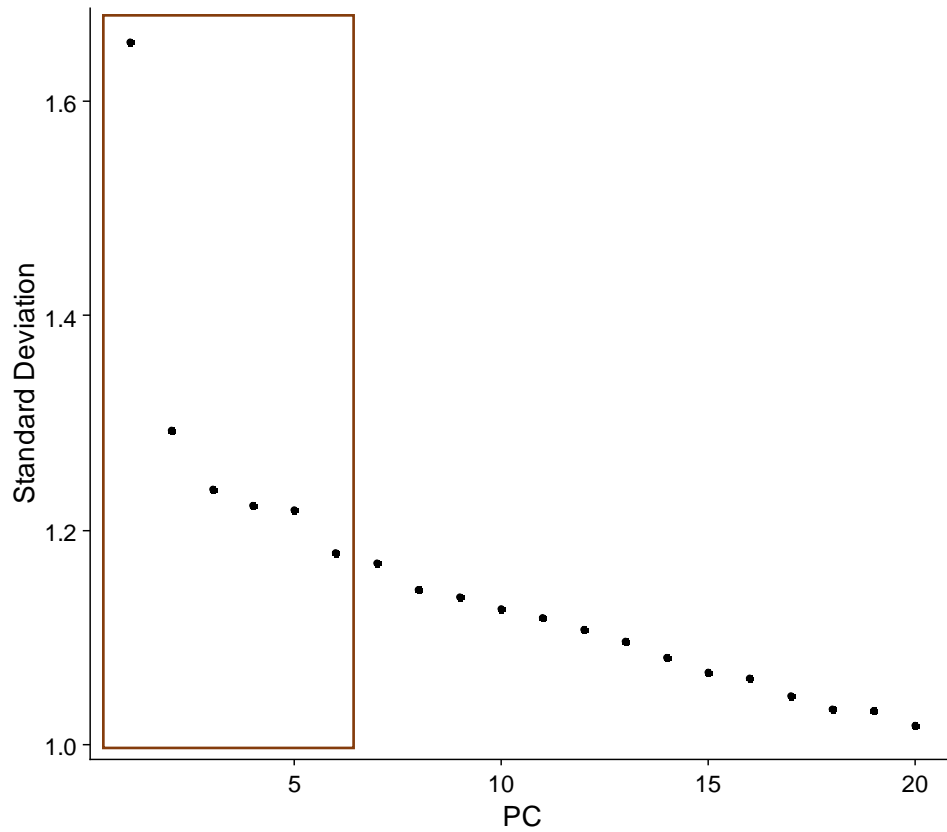

**Figure S12.** Principal components' standard deviations obtained from PCAs carried for chromosome-encoded genes datasets E2 using plasmid genes only. The 9 first dimensions were used for finding cell clustering and UMAP projection (Fig. S14).

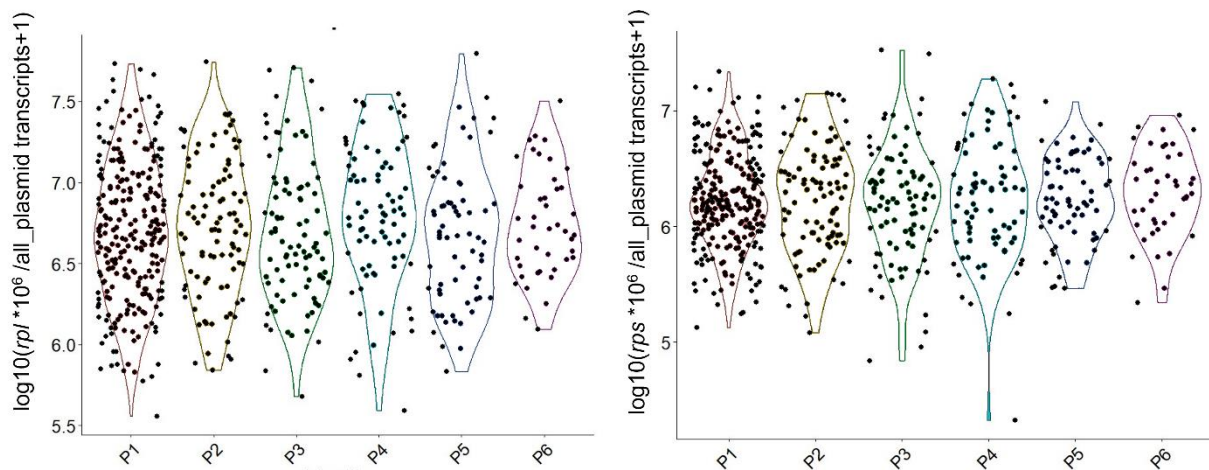

**Figure S13.** Normalized summed transcript counts of *rpl* and *rps* genes genes from individual cells displayed on top of the UMAP generated with the plasmid single-cell transcriptomes and on a violin plot according to P clusters.
